# Supplementary material for: Accessing the Association Between Immigration Status and Annual Health Care Expenditures in the United States: An IPUMS-MEPS Analysis
Source: Research Square preprint supplement (doi:10.21203/rs.3.rs-6815938/v1), 2025-09-17
Supplement: Supplementary file 1 [file f36e8c0748c3e3d767ece82c.docx]

Table 1: Demographic Characteristics of Included Participants between 2011-2021, N=225,140

| Description | N | Mean (SD) or Percentage |
| --- | --- | --- |
| Age in Years | 225,140 | 41.242 (21.762) |
| Years of Education Completed (YEC) | 225,140 | 11.358 (4.585) |
| Sex |  |  |
| Male | 106,792 | 47.43% |
| Female | 118,348 | 52.57% |
| Family Size | 225,140 | 3.204 (1.729) |
| Hispanic Ethnicity |  |  |
| No | 165,640 | 73.57% |
| Yes | 59,500 | 26.43% |
| Race |  |  |
| White (referent) | 162,414 | 72.14% |
| Black/ African American | 39,218 | 17.42% |
| Alaskan Native/ American Indian | 1,880 | 0.84% |
| Asian | 13,641 | 6.06% |
| Pacific Islander | 843 | 0.37% |
| Other/Multiple Races | 7,144 | 3.17% |
| SNAP Receipt |  |  |
| No | 187,930 | 83.47% |
| Yes | 37,210 | 16.53% |
| Annual Household Income (AHI) | 225,140 | 355.812 (335.456) |
| Annual Health Care Expenditure (AHCE) | 225,140 | 5446.87 (16433.234) |
| U.S.-born |  |  |
| No | 43,564 | 19.35% |
| Yes | 181,576 | 80.65% |

Table 2: Correlations between Independent Variable, Dependent Variable, and Control Variables

|  | Annual Health Care Expenditure (AHCE) | U.S.-Born | Annual Household Income (AHI) | Age | Years of Education Completed (YEC) | Family Size | Hispanic Ethnicity | Race | Sex | SNAP Receipt |
| --- | --- | --- | --- | --- | --- | --- | --- | --- | --- | --- |
| Annual Health Care Expenditure (AHCE) | 1.00 |  |  |  |  |  |  |  |  |  |
| U.S.-Born | 0.05*** | 1.00 |  |  |  |  |  |  |  |  |
| Annual Household Income (AHI) | 0.03*** | 0.06*** | 1.00 |  |  |  |  |  |  |  |
| Age | 0.22*** | -0.09*** | 0.16*** | 1.00 |  |  |  |  |  |  |
| Years of Education Completed (YEC) | 0.09*** | -0.01** | 0.32*** | 0.50*** | 1.00 |  |  |  |  |  |
| Family Size | -0.15*** | -0.10*** | -0.15*** | -0.48*** | -0.36*** | 1.00 |  |  |  |  |
| Hispanic Ethnicity | -0.08*** | -0.37*** | -0.21*** | -0.19*** | -0.25*** | 0.26*** | 1.00 |  |  |  |
| Race | -0.02*** | -0.13*** | -0.01*** | -0.08*** | -0.02*** | 0.03*** | -0.18*** | 1.00 |  |  |
| Sex | 0.03*** | -0.01*** | -0.06*** | 0.05*** | 0.03*** | -0.01*** | -0.00 | 0.01*** | 1.00 |  |
| SNAP Receipt | 0.01*** | -0.00*** | -0.32*** | -0.12*** | -0.22*** | 0.15*** | 0.10*** | 0.04*** | 0.05*** | 1.00 |

Note: *** p<0.01, ** p<0.05, * p<0.1.

Table 3: Ordinary Least Squares (OLS) Regression Model

|  | Model 1 | Model 2 | Model 3 | Model 4 | Model 5 |
| --- | --- | --- | --- | --- | --- |
| Annual Health Care Expenditure (AHCE) | | | | | |
| U.S.-Born | 2,078*** | 2,090*** | 426.0 | 3,678*** | 2,064*** |
| (87.56) | (103.30) | (235.60) | (254.10) | (312.50) |
| Annual Household Income (AHI) |  | 0.31** | 0.34** | 0.30** | 0.34** |
| (0.11) | (0.11) | (0.11) | (0.11) |
| Age |  | 157.20*** | 125.70*** | 160.60*** | 125.40*** |
| (1.97) | (4.46) | (2.03) | (4.46) |
| Years of Education Completed (YEC) |  | -105.00*** | -119.50*** | 2.88 | 5.48 |
| (9.03) | (9.22) | (18.17) | (18.17) |
| Family Size |  | -462.80*** | -462.70*** | -459.50*** | -458.80*** |
| (23.00) | (23.00) | (23.00) | (23.00) |
| Hispanic Ethnicity |  | -1,10*** | -1,06*** | -1,05*** | -1,01*** |
| (95.82) | (95.92) | (96.02) | (96.16) |
| Race |  |  |  |  |  |
| White (referent) |  | -1,20*** | -1,18*** | -1,23*** | -1,21*** |
| (96.20) | (96.21) | (96.28) | (96.27) |
| Black/African American |  | 278.60 | 242.00 | 281.70 | 240.60 |
| (370.70) | (370.60) | (370.60) | (370.60) |
| American Indian/ Alaska Native |  | -1,19*** | -1,12*** | -1,35*** | -1,31*** |
| (160.20) | (160.40) | (162.00) | (162.00) |
| Asian |  | -1,03 | -1,00 | -1,07 | -1,05 |
| (552.10) | (552.10) | (552.10) | (552.00) |
| Other/Multiple Races |  | 1,15*** | 1,18*** | 1,12*** | 1,15*** |
| (194.50) | (194.50) | (194.50) | (194.50) |
| Sex |  | 770.10*** | 772.20*** | 776.00*** | 779.50*** |
| (67.73) | (67.72) | (67.73) | (67.72) |
| SNAP Receipt |  | 1,93*** | 1,94*** | 1,93*** | 1,93*** |
| (97.34) | (97.34) | (97.34) | (97.33) |
| U.S.-Born X Age |  |  | 37.86*** |  | 43.11*** |
|  | (4.82) |  | (4.86) |
| U.S.-Born X YEC |  |  |  | -138.60*** | -163.10*** |
|  |  | (20.26) | (20.45) |
| Constant | 3,77*** | -344.80 | 1,20*** | -1,73*** | -214.50 |
| (78.64) | (205.30) | (284.00) | (288.00) | (334.70) |
| Observations | 225,140 | | | | |
| R-squared | 0.00 | 0.06 | 0.06 | 0.06 | 0.06 |
| dfModel | 1 | 13 | 14 | 14 | 15 |
| dfError | 225,138 | 225,126 | 225,125 | 225,125 | 225,124 |
| F | 563.40 | 1036 | 966.40 | 965.30 | 906.50 |

Note: *** p<0.01, ** p<0.05, * p<0.1.
